# Supplementary material for: Cell death mechanisms of the anti-cancer drug etoposide on human cardiomyocytes isolated from pluripotent stem cells
Source: PubMed Central journal article supplement (PMC5882643; doi:10.1007/s00204-018-2170-7), 2018-02-03
Supplement: 204_2018_2170_MOESM2_ESM.pdf [file 204_2018_2170_MOESM2_ESM.pdf]

## Figure S1

### S1A

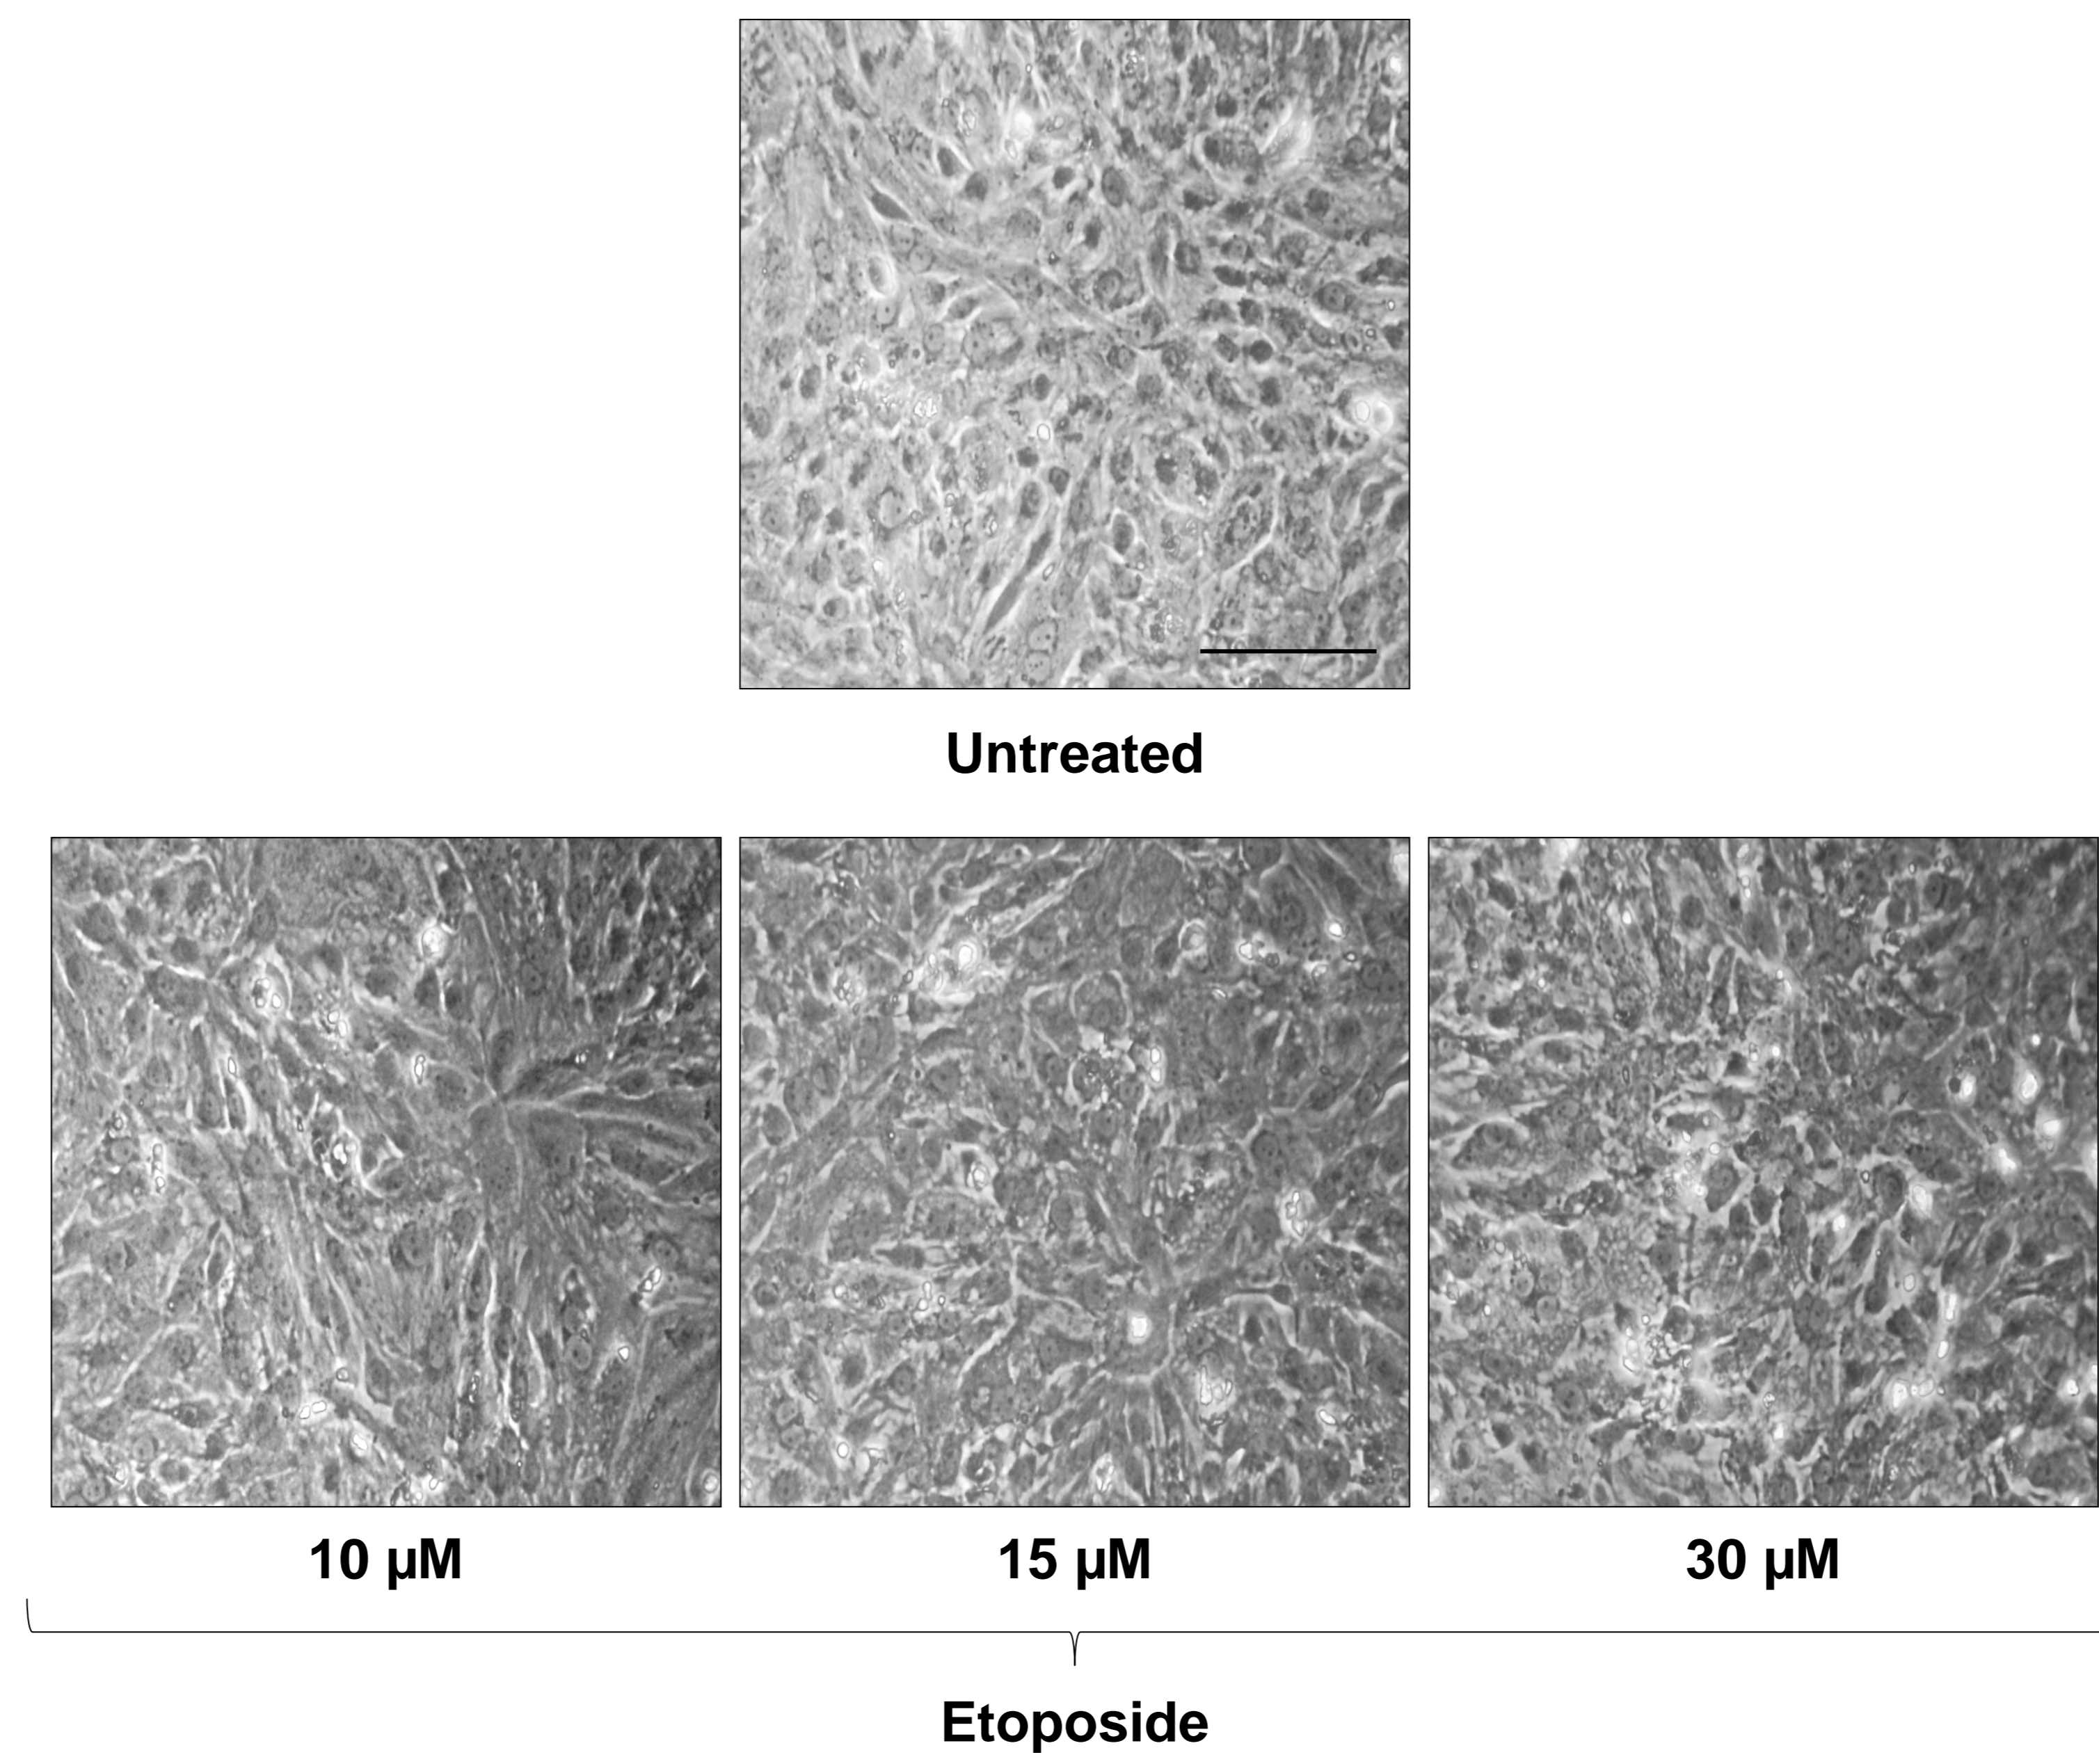

### S1B

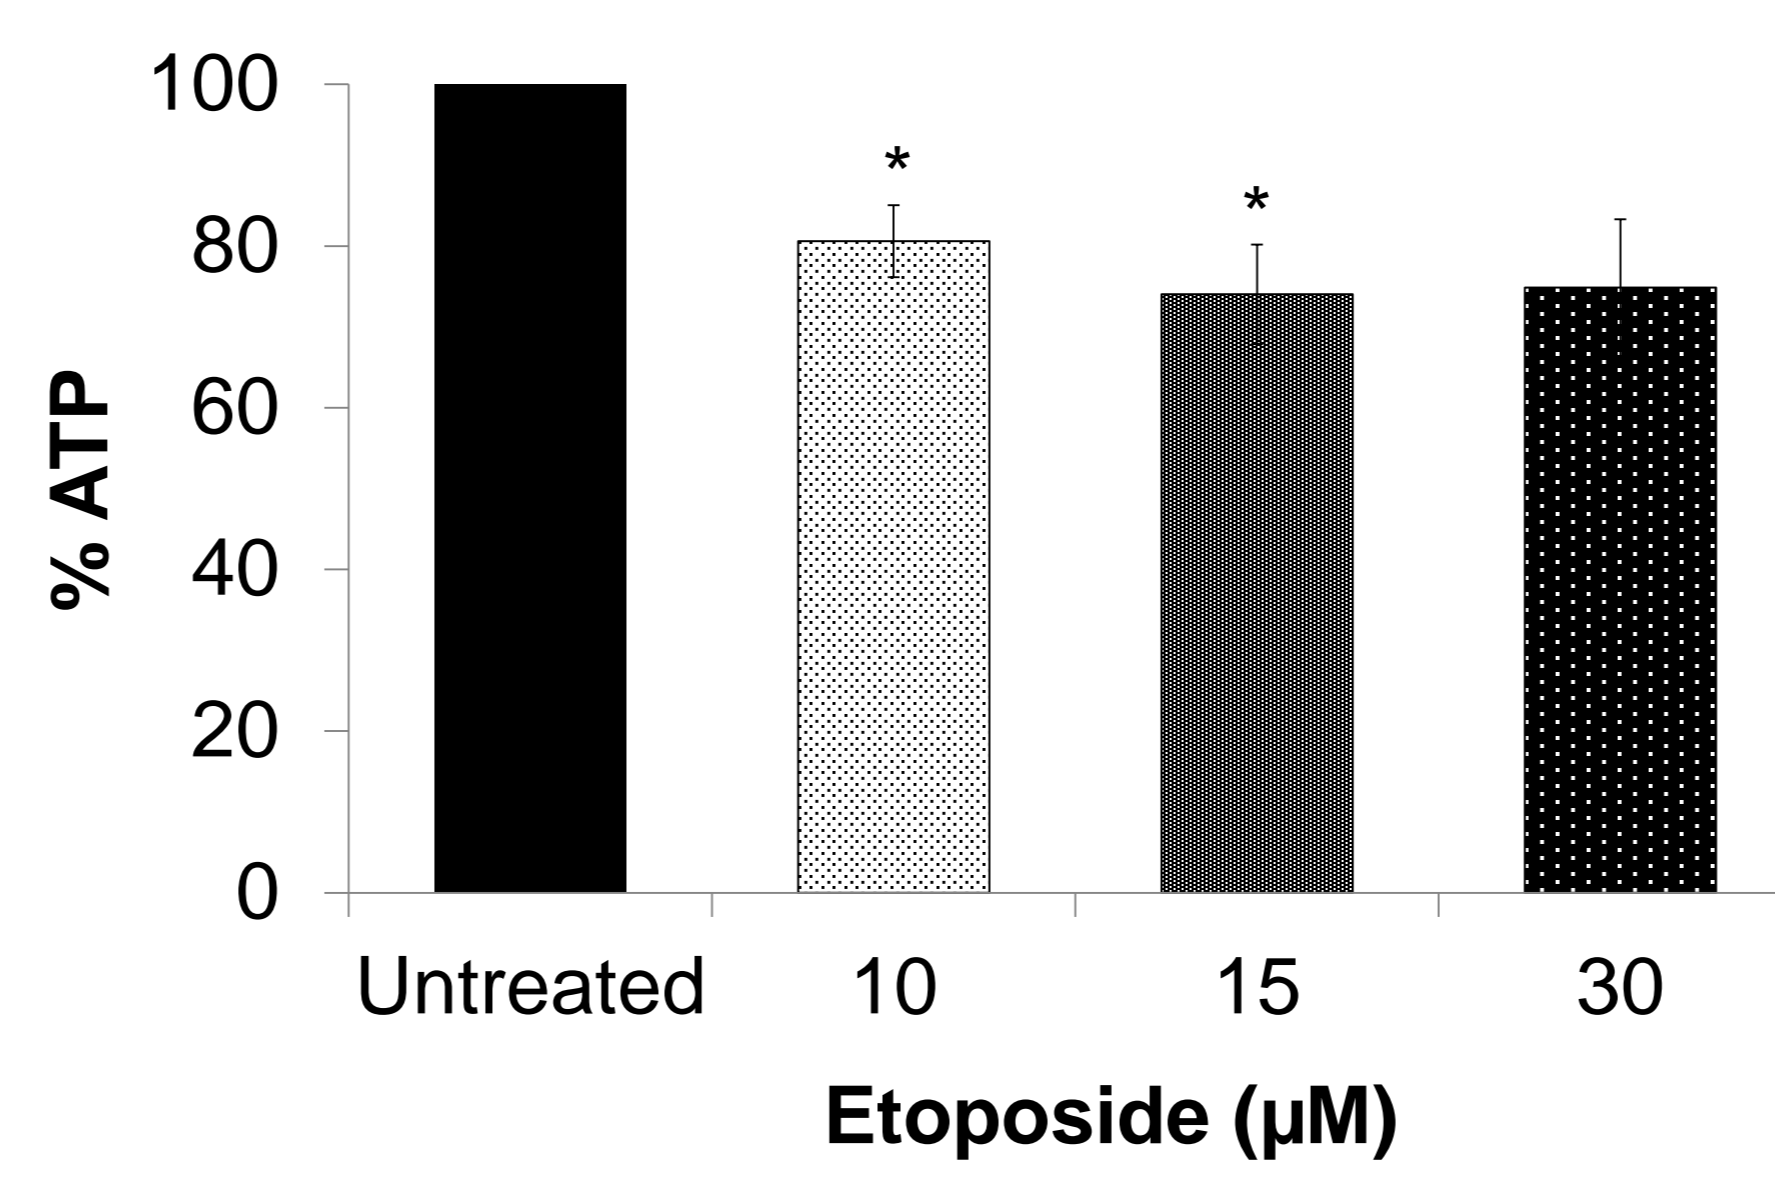

**Supplementary figure 1.** A) Influence of single high-dose of ETP (10 μM, 15 μM and 30 μM) on cell density and cell morphology. The scale bar represents 50 μm. B) Influence of single high-dose of ETP (10 μM, 15 μM and 30 μM) on intracellular ATP levels in hiPSC-CMs. (n = 3, error bars represent ± SEM) (t test, \*p ≤ 0.05).

## Figure S2

### S2A

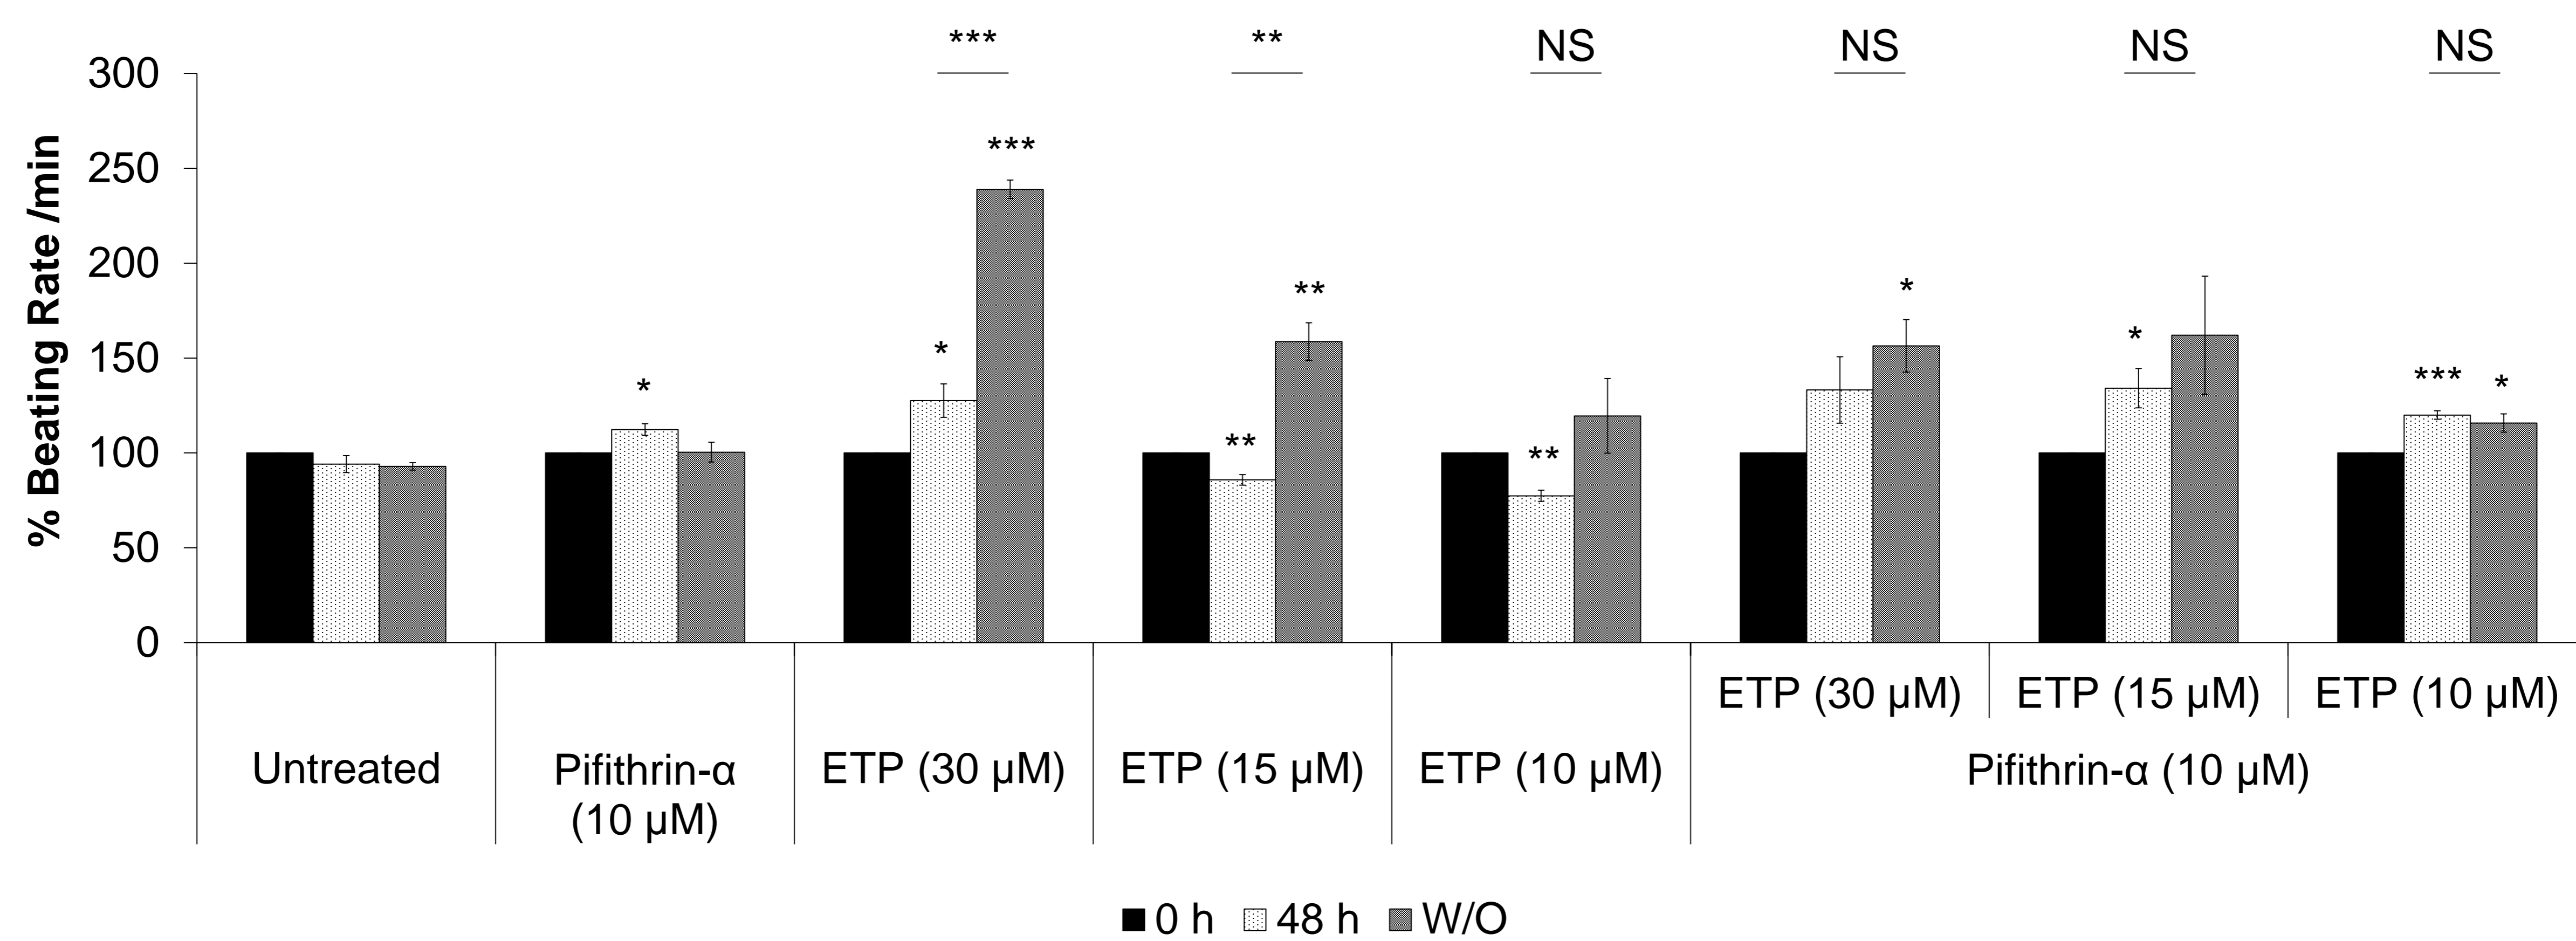

### S2B

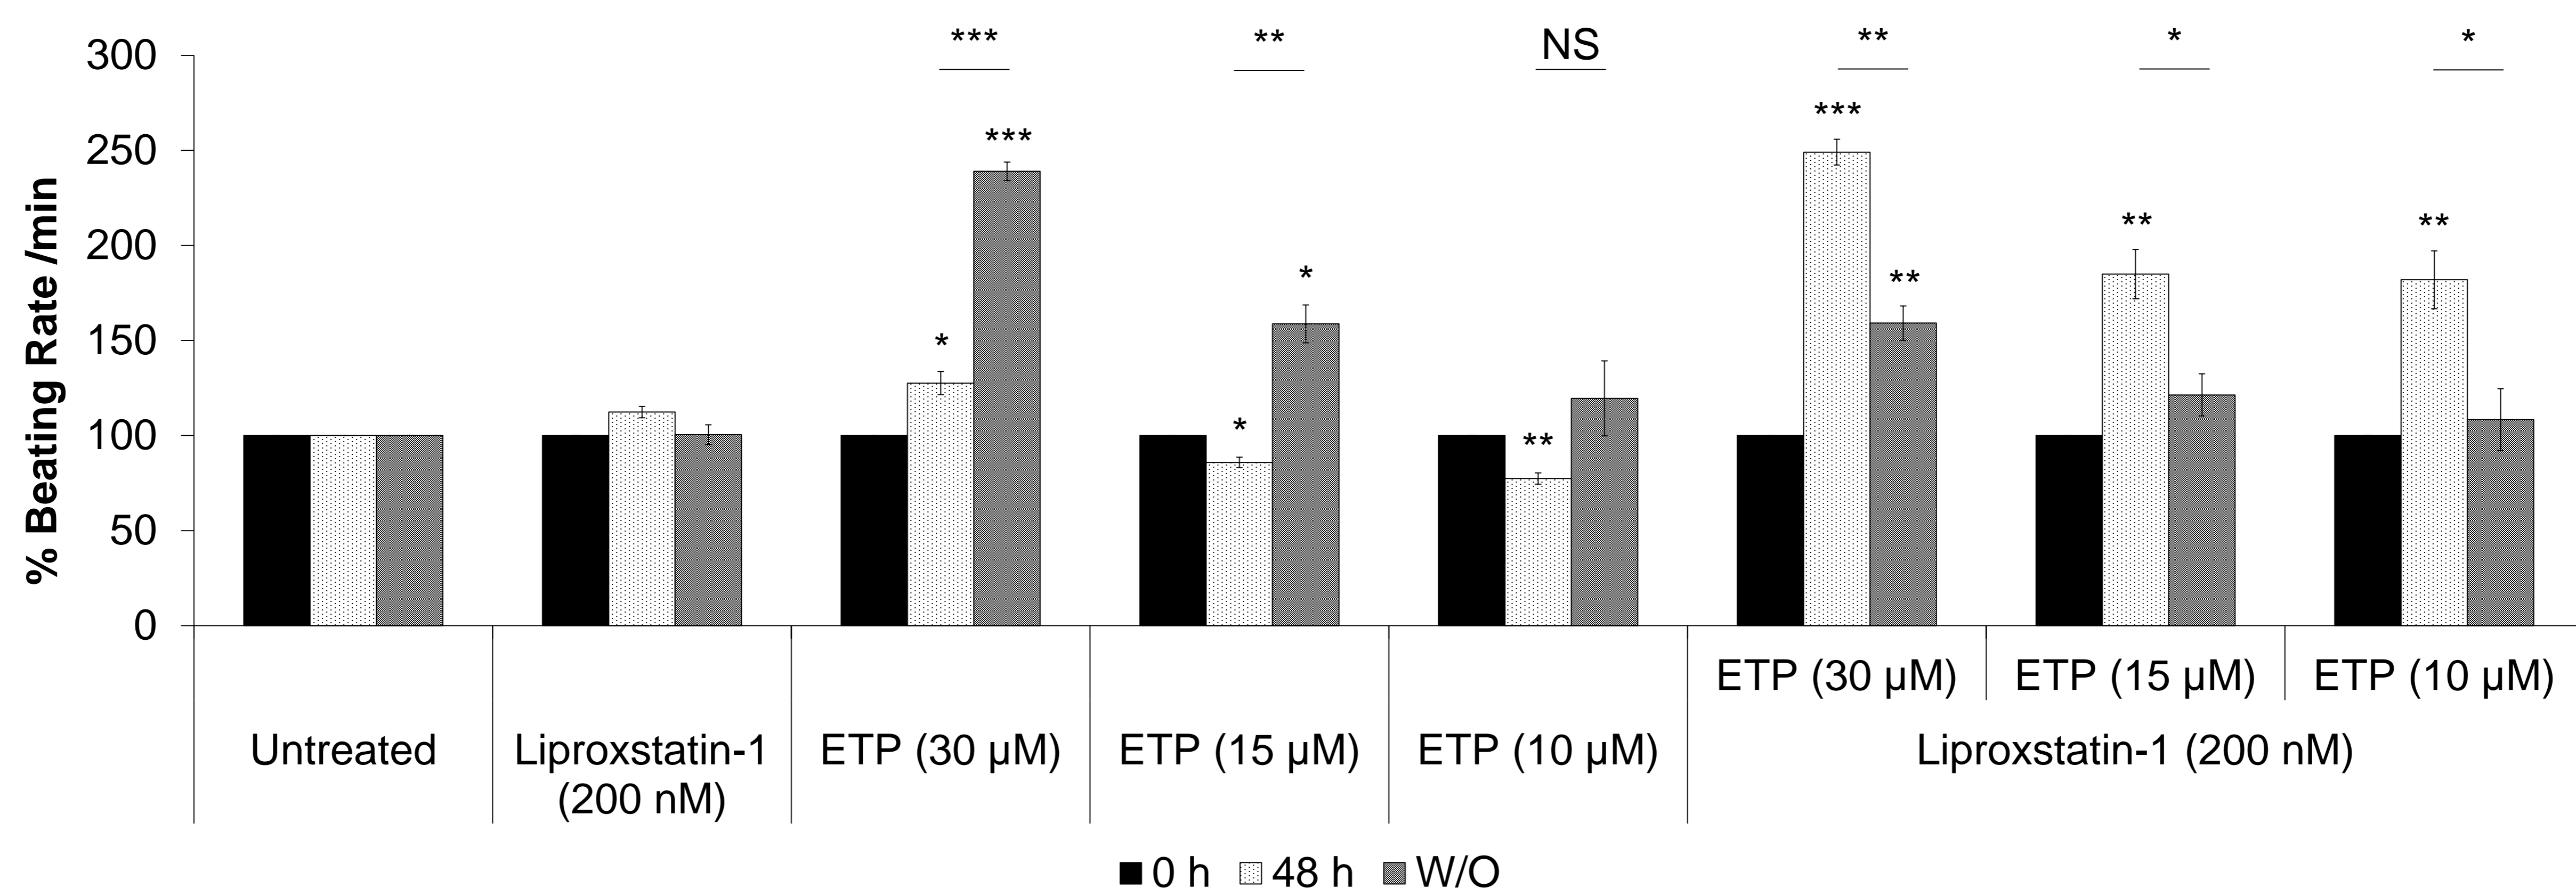

**Supplementary figure 2.** A) The hiPSC-CMs were co-treated with ETP and 10 μM Pifithrin-α (apoptosis inhibitor) for 48 h. Real time data of CMs beating rate was obtained using xCELLigence RTCA system. Representative graphs display % beating rate values. (n = 3, error bars represent ± SEM) (t test, \*p ≤ 0.05, \*\*p ≤ 0.01, \*\*\*p ≤ 0.001, NS, non-significant). B) The hiPSC-CMs were co-treated with ETP and 200 nM Liproxstatin-1 (ferroptosis inhibitor) for 48 h. Real time data of CMs beating rate was obtained using xCELLigence RTCA system. Representative graphs display % beating rate values. (n = 3, error bars represent ± SEM) (t test, \*p ≤ 0.05, \*\*p ≤ 0.01, \*\*\*p ≤ 0.001, NS, non-significant).

**Supplementary table 1.** The fold change values for 84 genomic markers after Etoposide treatment

|          | Etoposide ( $\mu\text{M}$ ) |      |      |
|----------|-----------------------------|------|------|
|          | 10                          | 15   | 30   |
| TNNI3    | 0.3                         | -1.1 | -1.7 |
| MYL2     | 0.3                         | -1.3 | -3.2 |
| MYL3     | -1.6                        | -2.0 | -5.1 |
| ACTA1    | -1.7                        | -2.0 | -3.3 |
| TNNT1    | 1.7                         | 1.6  | 1.6  |
| DES      | -1.5                        | -1.7 | -3.2 |
| TCAP     | 1.3                         | -0.3 | -2.1 |
| PGAM2    | -0.4                        | -0.5 | -1.5 |
| HRC      | -0.5                        | -0.5 | -1.7 |
| MYOM2    | -1.4                        | -1.5 | -2.1 |
| MB       | -0.3                        | -1.1 | -1.4 |
| FHL2     | -1.4                        | -1.7 | -3.7 |
| MYH6     | 0.3                         | 1.1  | 1.2  |
| MYH7     | -1.6                        | -1.6 | -3.8 |
| GJA5     | -1.9                        | -2.0 | -2.3 |
| ANK2     | -1.3                        | -1.1 | -1.2 |
| ARG2     | -2.3                        | -2.3 | -2.3 |
| EDNRA    | -1.2                        | -1.2 | -1.6 |
| LDB3     | -0.5                        | -1.2 | -1.8 |
| CASQ2    | -0.6                        | -1.5 | -3.2 |
| DMD      | -1.5                        | -1.6 | -2.1 |
| NRAP     | 1.3                         | 1.3  | -1.9 |
| UCP2     | -2.3                        | -2.3 | -2.9 |
| COX6A2   | -1.3                        | -1.6 | -3.6 |
| ATP1B4   | 1.8                         | 1.9  | 0.7  |
| ATP1A2   | -1.2                        | -1.3 | -2.1 |
| KCNQ1    | -1.2                        | -1.2 | -1.5 |
| KCNK3    | 0.6                         | 1.4  | 1.4  |
| KCNN2    | -1.4                        | -1.7 | -2.7 |
| KCNH2    | 0.5                         | 1.3  | 1.3  |
| SCN2B    | 0.6                         | 1.3  | 1.1  |
| SCN5A    | 0.4                         | 1.1  | -1.0 |
| SLC8A1   | -1.5                        | -1.6 | -2.6 |
| CACNA2D2 | -1.5                        | -1.3 | -1.3 |
| PYGM     | -2.6                        | -2.9 | -3.5 |
| CKM      | -1.9                        | -2.6 | -5.0 |
| KRT19    | 1.4                         | 1.6  | 2.0  |
| ANK1     | 7.9                         | 10.0 | 10.4 |
| PDLIM3   | 2.9                         | 3.0  | 2.9  |
| ABRA     | 1.9                         | 2.8  | 3.0  |
| MYOT     | 2.4                         | 2.5  | 2.9  |
| SCN4B    | 3.1                         | 3.1  | 2.9  |
| TRPV1    | 0.7                         | 1.7  | 2.5  |
| GLS2     | 2.6                         | 3.3  | 4.8  |
| PDK1     | -1.8                        | -2.0 | -2.2 |
| PDK4     | 0.6                         | 1.3  | 2.1  |
| BAX      | 3.1                         | 3.5  | 4.0  |
| CASP3    | 1.3                         | 1.5  | 1.6  |
| MURC     | -0.3                        | -0.4 | -1.4 |
| POSTN    | 2.1                         | 1.9  | 1.6  |
| ERBB3    | -1.5                        | -1.9 | -2.3 |
| JAK2     | 1.1                         | -1.2 | -0.7 |
| IGFBP3   | 1.3                         | 1.3  | 1.4  |
| PPP1R3A  | -0.4                        | -0.4 | -0.5 |
| RYR2     | -1.7                        | -1.7 | -2.5 |
| IRX4     | -1.4                        | -1.4 | -1.8 |
| CORIN    | -1.5                        | -1.6 | -1.7 |
| CACNA1G  | -1.5                        | -1.8 | -1.7 |
| ASPH     | -0.4                        | -0.3 | -1.1 |
| STC1     | 0.0                         | 0.6  | 2.8  |
| PRDM16   | -0.7                        | -0.6 | -1.4 |
| CALM1    | 1.4                         | 1.5  | 1.8  |
| ZMAT3    | 2.5                         | 2.8  | 3.1  |
| GDF15    | 53.1                        | 72.1 | 89.3 |
| ACE2     | 2.0                         | 2.1  | 1.9  |
| AVPR1A   | 6.8                         | 10.0 | 11.8 |
| FAS      | 9.1                         | 10.0 | 14.8 |
| PRKX     | 4.2                         | 5.1  | 5.9  |
| DUSP4    | 4.3                         | 5.8  | 10.2 |
| GNPMB    | 0.9                         | 1.8  | 1.8  |
| SPATA18  | 4.8                         | 5.4  | 6.1  |
| THBS4    | 1.9                         | 1.9  | 1.8  |
| RGCC     | 2.1                         | 2.7  | 4.7  |
| NRG1     | 2.8                         | 3.8  | 4.3  |
| CTGF     | 3.3                         | 4.1  | 5.9  |
| KCNJ2    | 1.4                         | 1.5  | 1.4  |
| F11R     | 2.1                         | 2.5  | 3.1  |
| TPM1     | -1.0                        | -1.2 | -1.7 |
| KLF5     | 0.8                         | 1.8  | 1.9  |
| GADD45A  | 3.4                         | 3.9  | 4.2  |
| GPX1     | 2.0                         | 2.4  | 2.8  |
| LIF      | 7.2                         | 9.7  | 14.7 |
| NQO1     | 1.1                         | 1.3  | 1.9  |
| OXR1     | 1.1                         | 1.2  | 1.2  |

**Supplementary table 2.** The fold change values of 14 miRNAs after Etoposide treatment

|                 | Etoposide ( $\mu\text{M}$ ) |     |     |
|-----------------|-----------------------------|-----|-----|
|                 | 10                          | 15  | 30  |
| hsa-miR-486-3p  | 5.1                         | 5.2 | 6.4 |
| hsa-miR-34c-5p  | 2.2                         | 2.2 | 2.1 |
| hsa-miR-4423-3p | 2.3                         | 2.2 | 2.0 |
| hsa-miR-182-5p  | 1.4                         | 1.7 | 2.9 |
| hsa-miR-139-5p  | 1.2                         | 1.6 | 2.3 |
| hsa-miR-34a-3p  | 1.8                         | 1.6 | 1.4 |
| hsa-miR-1303    | 1.2                         | 1.6 | 1.7 |
| hsa-miR-187-3p  | 1.3                         | 1.1 | 1.0 |
| hsa-miR-486-5p  | 1.3                         | 1.0 | 1.0 |
| hsa-miR-34c-3p  | 1.0                         | 1.2 | 1.1 |
| hsa-miR-212-3p  | 0.8                         | 0.8 | 0.7 |
| hsa-miR-4298    | 0.8                         | 0.9 | 0.8 |
| hsa-miR-3911    | 0.9                         | 0.9 | 0.8 |
| hsa-miR-675-5p  | 0.7                         | 0.7 | 0.7 |
